# Supplementary material
Source: publisher figshare collection journal article supplement (https://sage.figshare.com/ndownloader/files/15551123)

## Supplementary material

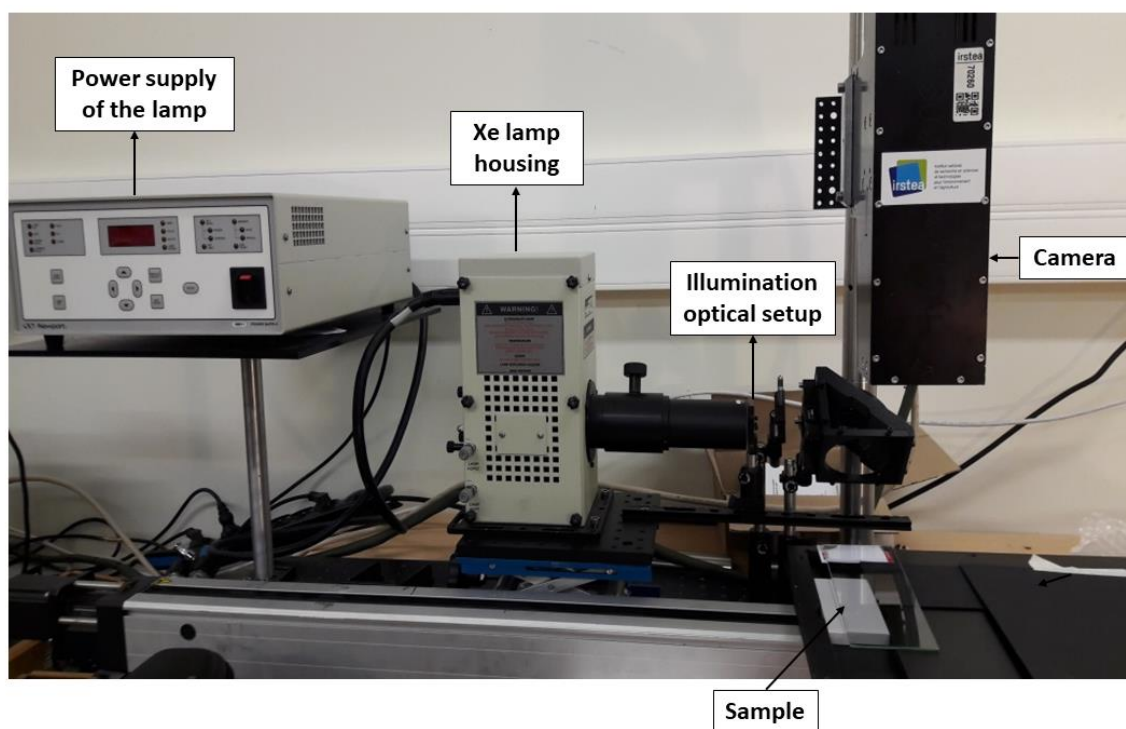

Fig.S1. Polarization HSI setup.

Supplement: Supplementary file 1 [file 15551123]
